# Supplementary material
Source: publisher figshare collection journal article supplement (https://frontiersin.figshare.com/ndownloader/files/25444265)

Supplementary Figure S2. Wireframe visualization of the landmarks employed in the study. A) Landmarks taken on Cv; B) Landmarks taken on Th and Thm; C) Landmarks taken on ThTa, TaTm, Tm and TmTp; D) Landmarks taken on Tp; and E) Landmarks taken on TS. See Figure 2 for references on region names. Anterior view of the figures shows in red all landmarks taken on the posterior side of the vertebra. Dorsal and left lateral view are employed to clarify landmarks on the transverse and neural processes, respectively. There is no dorsal view in E due to the lack of transverse processes. N°: order in which landmarks were digitized. See Figure 2 for region names.

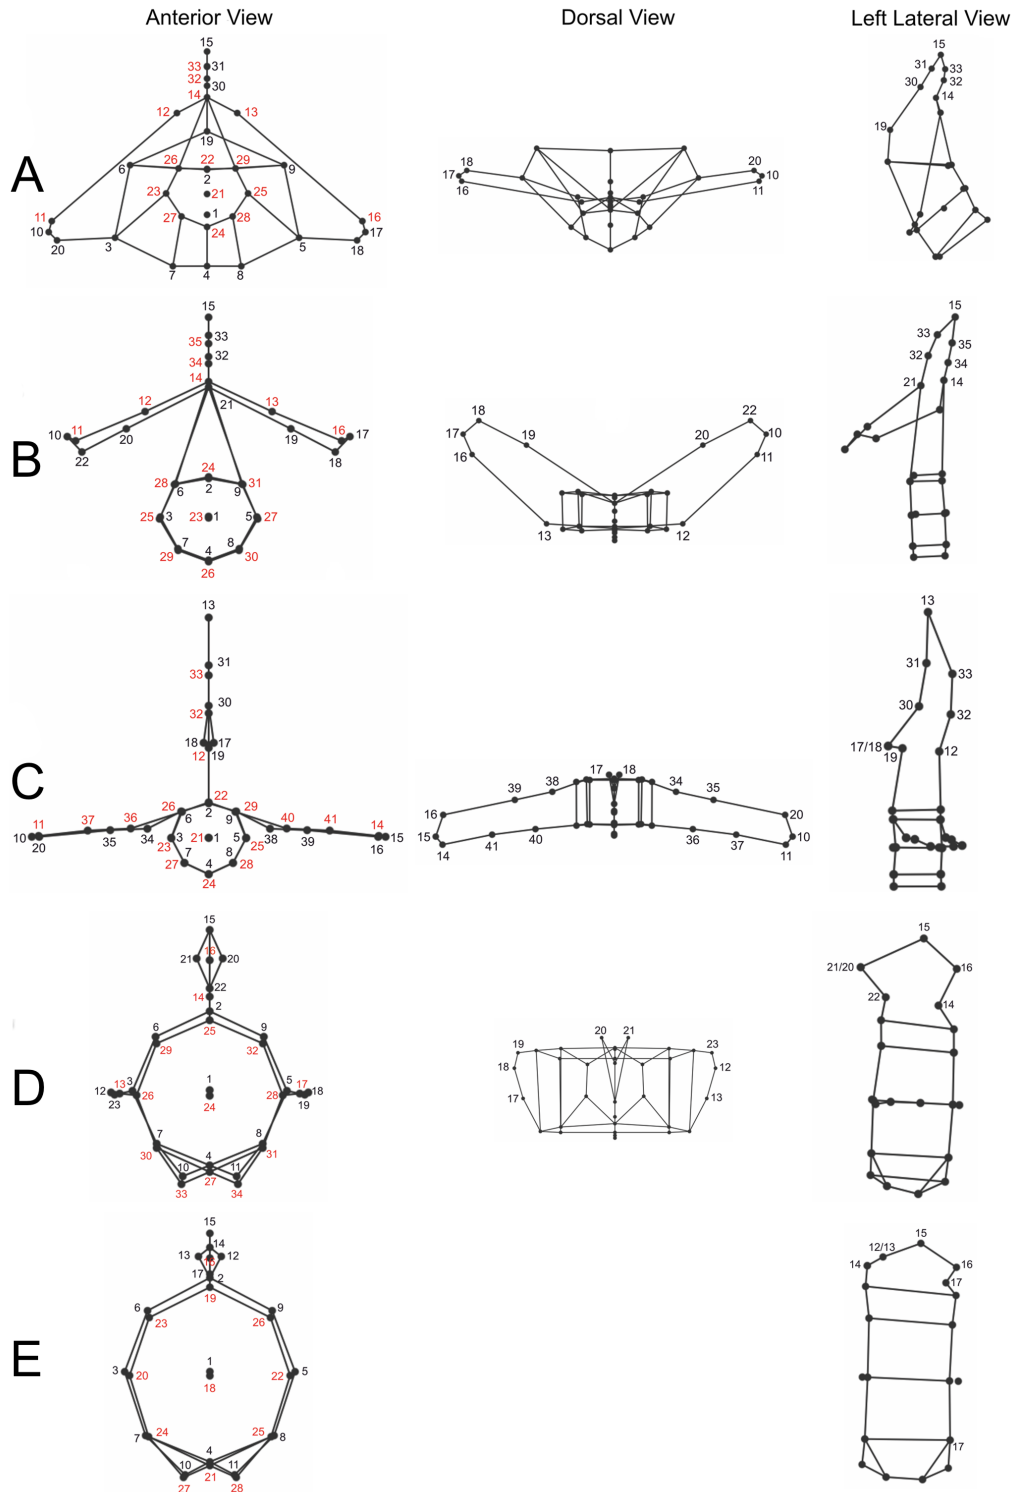

Supplement: Supplementary file 1 [file 25444265]
